# Supplementary material for: Phage-Encoded Sigma Factors Alter Bacterial Dormancy
Source: PubMed Central journal article supplement (PMC9429907; doi:10.1128/msphere.00297-22), 2022-07-20
Supplement: msphere.00297-22-s0003.pdf [file msphere.00297-22-s0003.pdf]

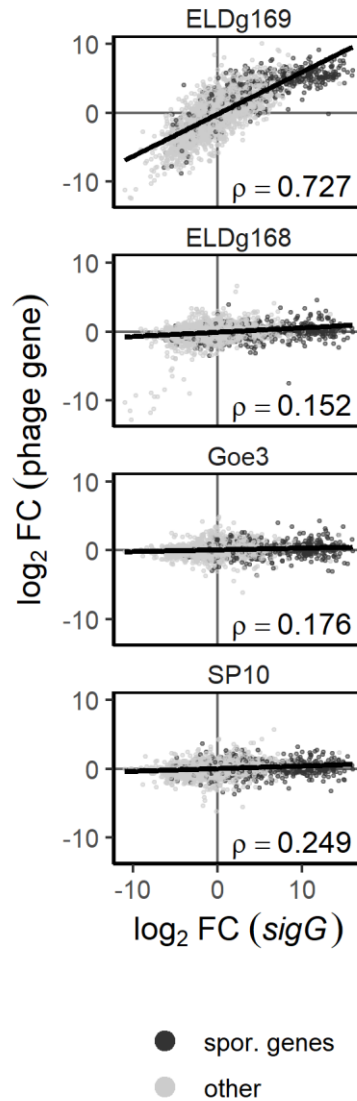

**Fig. S3.** Supplement to main RNAseq figure (Fig. 3c). Correlation of differential gene expression for cells induced to express phage-encoded sigma factors (noted above each plot) and cells induced to express bacteria-encoded sigma factor (*sigG*). Spearman's correlation coefficient ( $\rho$ ) is displayed. ELD = phage Eldridge.
