# Supplementary material for: Phage-Encoded Sigma Factors Alter Bacterial Dormancy
Source: PubMed Central journal article supplement (PMC9429907; doi:10.1128/msphere.00297-22), 2022-07-20
Supplement: msphere.00297-22-s0007.pdf [file msphere.00297-22-s0007.pdf]

**Table S1.** Enrichment of sporulation genes among differentially expressed genes.

| Gene induced | Dir. <sup>1</sup> | Differentially Expressed genes |       | Unchanged genes    |       | Total spor. genes (m) <sup>3</sup> | total other genes (n) <sup>3</sup> | total changed (k) <sup>3</sup> | <i>P</i> -value | adjusted <i>P</i> <sup>4</sup> |
|--------------|-------------------|--------------------------------|-------|--------------------|-------|------------------------------------|------------------------------------|--------------------------------|-----------------|--------------------------------|
|              |                   | Spor. <sup>2</sup>             | other | Spor. <sup>2</sup> | other |                                    |                                    |                                |                 |                                |
| ELDg168      | up                | 29                             | 193   | 567                | 2789  | 645                                | 3240                               | 222                            | 0.917           | 1.000                          |
| ELDg168      | down              | 49                             | 258   | 567                | 2789  | 645                                | 3240                               | 307                            | 0.587           | 1.000                          |
| ELDg169      | up                | 390                            | 861   | 192                | 1291  | 645                                | 3240                               | 1251                           | 3.27E-60        | 1.96E-59<br>***                |
| ELDg169      | down              | 63                             | 1088  | 192                | 1291  | 645                                | 3240                               | 1151                           | 1.000           | 1.000                          |
| Goe3         | up                | 5                              | 17    | 640                | 3221  | 645                                | 3240                               | 22                             | 0.144           | 0.433                          |
| Goe3         | down              | 0                              | 2     | 640                | 3221  | 645                                | 3240                               | 2                              | 0.305           | 0.731                          |
| sigF         | up                | 338                            | 748   | 255                | 1618  | 645                                | 3240                               | 1086                           | 3.57E-48        | 1.43E-47<br>***                |
| sigF         | down              | 52                             | 874   | 255                | 1618  | 645                                | 3240                               | 926                            | 1.000           | 1.000                          |
| sigG         | up                | 305                            | 491   | 299                | 2170  | 645                                | 3240                               | 796                            | 4.74E-66        | 5.69E-65<br>***                |
| sigG         | down              | 41                             | 579   | 299                | 2170  | 645                                | 3240                               | 620                            | 1.000           | 1.000                          |
| SP10         | up                | 2                              | 28    | 642                | 3200  | 645                                | 3240                               | 30                             | 0.897           | 1.000                          |
| SP10         | down              | 1                              | 12    | 642                | 3200  | 645                                | 3240                               | 13                             | 0.662           | 1.000                          |

1. Direction of change: upregulated or downregulated.
2. Sporulation related genes, as defined in [subtiwiki.uni-goettingen.de](http://subtiwiki.uni-goettingen.de).
3. 'm', 'n' and 'k' are parameters of the hypergeometric test (phyper in R)
4. Multiple testing correction by the Benjamini, Hochberg, and Yekutieli method (\*\*\*) =  $P < 0.001$
