# Supplementary material for: Phage-Encoded Sigma Factors Alter Bacterial Dormancy
Source: PubMed Central journal article supplement (PMC9429907; doi:10.1128/msphere.00297-22), 2022-07-20
Supplement: msphere.00297-22-s0008.pdf [file msphere.00297-22-s0008.pdf]

**Table S2.** Statistical results for sporulation of cells expressing cloned sigma factors.

*Table S2a. Spore yield statistics.* We used flow cytometry to quantify spores and vegetative cells. With this data, we calculated the fraction of spores in cultures of *Bacillus subtilis* strains with sigma factors cloned under an IPTG-inducible promoter (indicated in “group 1” column), or with empty vector controls (“group 2”). The mean value of each group is the ratio of spore fraction in induced vs. non-induced cultures ( $n > 8$ ). We used a two-tailed Welch two Sample *t*-test, (difference in means  $\neq 0$ ) to compare cloned gene effect on sporulation between each of the cloned genes and the empty vector controls.

| Group 1 | Group 2      | <i>t</i> -value | df    | <i>P</i> -value | adjusted <i>P</i> <sup>1</sup> | Mean group 1 | Mean group 2 | Difference in means $\pm$ CI <sup>2</sup> |                   |
|---------|--------------|-----------------|-------|-----------------|--------------------------------|--------------|--------------|-------------------------------------------|-------------------|
| sigF    | empty vector | 6.432           | 8.199 | 0.000182        | 0.000545                       | ***          | 0.1585       | 1.024                                     | 0.865 $\pm$ 0.309 |
| sigG    | empty vector | 2.769           | 13.86 | 0.01519         | 0.02279                        | *            | 0.4906       | 1.024                                     | 0.533 $\pm$ 0.413 |
| ELDg168 | empty vector | 2.097           | 15.12 | 0.05324         | 0.06389                        |              | 0.6611       | 1.024                                     | 0.363 $\pm$ 0.368 |
| ELDg169 | empty vector | 7.802           | 7.003 | 0.000107        | 0.000545                       | ***          | 0.01658      | 1.024                                     | 1.01 $\pm$ 0.305  |
| Goe3    | empty vector | 4.387           | 8.864 | 0.001818        | 0.003635                       | **           | 0.4203       | 1.024                                     | 0.603 $\pm$ 0.312 |
| SP10    | empty vector | 0.4636          | 10.36 | 0.6525          | 0.6525                         |              | 0.9567       | 1.024                                     | 0.067 $\pm$ 0.321 |

1. Multiple testing correction by the Benjamini, Hochberg, and Yekutieli method (\* =  $P < 0.05$ , \*\* =  $P < 0.01$ , \*\*\* =  $P < 0.001$ )
2. CI = 95 % confidence interval

*Table S2b. Statistics associated with total cell densities following sigma factor induction.*

We used flow cytometry to quantify spores and vegetative cells in *Bacillus subtilis* strains with cloned sigma factor genes. We used a two-tailed One Sample *t*-test (mean  $\neq 0$ ) to compare the difference in cell densities between induced and non-induced paired samples.

| Cloned gene  | Cell type  | <i>t</i> -value | df | <i>P</i> -value | Adjusted <i>P</i> <sup>1</sup> | Mean $\pm$ CI <sup>2</sup> |
|--------------|------------|-----------------|----|-----------------|--------------------------------|----------------------------|
| empty vector | spores     | 0.3994          | 7  | 0.7015          | 0.7015                         |                            |
| sigF         | spores     | -4.05           | 7  | 0.00487         | 0.01136                        | *                          |
| sigG         | spores     | -5.491          | 7  | 0.0009151       | 0.005003                       | **                         |
| SP10         | spores     | -4.402          | 7  | 0.003148        | 0.009444                       | **                         |
| Goe3         | spores     | -5.453          | 7  | 0.000953        | 0.005003                       | **                         |
| ELDg168      | spores     | -4.114          | 9  | 0.002622        | 0.009444                       | **                         |
| ELDg169      | spores     | -13.81          | 9  | 2.30E-07        | 4.83E-06                       | ***                        |
| empty vector | vegetative | 1.115           | 7  | 0.3015          | 0.3333                         |                            |
| sigF         | vegetative | 0.7883          | 7  | 0.4564          | 0.4792                         |                            |
| sigG         | vegetative | -2.341          | 7  | 0.05178         | 0.09062                        |                            |
| SP10         | vegetative | -2.981          | 7  | 0.0205          | 0.03913                        | *                          |
| Goe3         | vegetative | 1.569           | 7  | 0.1607          | 0.2249                         |                            |
| ELDg168      | vegetative | 1.768           | 9  | 0.1108          | 0.179                          |                            |
| ELDg169      | vegetative | 1.368           | 9  | 0.2045          | 0.2526                         |                            |

Table S2b. continued

| Cloned gene  | Cell type   | t-value | df | P-value  | Adjusted P <sup>1</sup> | Mean ± CI <sup>2</sup>   |
|--------------|-------------|---------|----|----------|-------------------------|--------------------------|
| empty vector | total cells | 1.49    | 7  | 0.1797   | 0.2359                  | 1.44e+07 ± 2.28e+07      |
| sigF         | total cells | -1.191  | 7  | 0.2723   | 0.3177                  | -4.52e+07 ± 8.97e+07     |
| sigG         | total cells | -4.109  | 7  | 0.004523 | 0.01136                 | * -8.79e+07 ± 5.06e+07   |
| SP10         | total cells | -4.522  | 7  | 0.002727 | 0.009444                | ** -4.66e+07 ± 2.44e+07  |
| Goe3         | total cells | -1.599  | 7  | 0.1539   | 0.2249                  | -2.79e+07 ± 4.12e+07     |
| ELDg168      | total cells | -2.896  | 9  | 0.0177   | 0.03718                 | * -1.82e+07 ± 1.42e+07   |
| ELDg169      | total cells | -8.405  | 9  | 1.49E-05 | 0.0001563               | *** -7.89e+07 ± 2.12e+07 |

1. Multiple testing correction by the Benjamini, Hochberg, and Yekutieli method (\* =  $P < 0.05$ , \*\* =  $P < 0.01$ , \*\*\* =  $P < 0.001$ )
2. For each paired samples the difference in cell densities (per mL) are calculated as *induced culture* – *non-induced culture*. CI = 95 % confidence interval
