# Supplementary material for: Phage-Encoded Sigma Factors Alter Bacterial Dormancy
Source: PubMed Central journal article supplement (PMC9429907; doi:10.1128/msphere.00297-22), 2022-07-20
Supplement: msphere.00297-22-s0009.pdf [file msphere.00297-22-s0009.pdf]

**Table S3.** Sigma factor protein groups of homologs*Table S3a. Viral orthologous groups (VOG\*) of sigma factors*

| <b>Group Name</b> | <b>Consensus Functional Description</b>                                  | <b>Protein Count</b> | <b>Species Count</b> |
|-------------------|--------------------------------------------------------------------------|----------------------|----------------------|
| VOG00050          | sp P33658 RPSG_CLOAB RNA polymerase sigma-G factor                       | 315                  | 238                  |
| VOG01445          | REFSEQ sigma-70 family RNA polymerase sigma factor                       | 18                   | 18                   |
| VOG02363          | sp P04524 SIGML_BPT4 RNA polymerase sigma-like factor                    | 372                  | 371                  |
| VOG10659          | REFSEQ putative sigma factor                                             | 5                    | 5                    |
| VOG12686          | sp P03048 RP28_BPSP1 RNA polymerase sigma GP28 factor                    | 6                    | 6                    |
| VOG13572          | REFSEQ RNA polymerase sigma factor                                       | 4                    | 4                    |
| VOG19786          | REFSEQ sigma70, RNA polymerase sigma factor, positive control factor Xpf | 2                    | 2                    |
| VOG22313          | REFSEQ sigma-70 family RNA polymerase sigma factor                       | 2                    | 2                    |
| VOG28223          | REFSEQ RNA polymerase sigma factor SigF                                  | 2                    | 2                    |

\*Data from VOG release vog209, vogdb.org

*Table S3b. TIGRFAM\* protein families of bacterial sigma factors*

| <b>ID</b>    | <b>Accession</b> | <b>Description</b>                               | <b>Label in main Fig. 3</b> |
|--------------|------------------|--------------------------------------------------|-----------------------------|
| rpoH_proteo  | TIGR02392        | alternative sigma factor RpoH                    | other                       |
| RpoD_Cterm   | TIGR02393        | RNA polymerase sigma factor RpoD                 | other                       |
| rpoS_proteo  | TIGR02394        | RNA polymerase sigma factor RpoS                 | other                       |
| rpoN_sigma   | TIGR02395        | RNA polymerase sigma-54 factor                   | other                       |
| FliA_WhiG    | TIGR02479        | RNA polymerase sigma factor, FliA/WhiG family    | other                       |
| spore_sigmaE | TIGR02835        | RNA polymerase sigma-E factor                    | sigE                        |
| spore_sigmaK | TIGR02846        | RNA polymerase sigma-K factor                    | sigK                        |
| spore_sigG   | TIGR02850        | RNA polymerase sigma-G factor                    | sigG                        |
| spore_sigH   | TIGR02859        | RNA polymerase sigma-H factor                    | other                       |
| spore_sigF   | TIGR02885        | RNA polymerase sigma-F factor                    | sigF                        |
| spore_sigI   | TIGR02895        | RNA polymerase sigma-I factor                    | other                       |
| sigma70-ECF  | TIGR02937        | RNA polymerase sigma factor, sigma-70 family     | other                       |
| RpoE_Sigma70 | TIGR02939        | RNA polymerase sigma factor RpoE                 | other                       |
| Sigma_B      | TIGR02941        | RNA polymerase sigma-B factor                    | other                       |
| Sig70_famx1  | TIGR02943        | RNA polymerase sigma-70 factor, TIGR02943 family | other                       |
| SigH_actino  | TIGR02947        | RNA polymerase sigma-70 factor, TIGR02947 family | other                       |
| SigW_bacill  | TIGR02948        | RNA polymerase sigma-W factor                    | other                       |
| SigM_subfam  | TIGR02950        | RNA polymerase sigma factor, SigM family         | other                       |

*Continued on next page*

\* Data from ncbi.nlm.nih.gov/hmm/TIGRFAMs/release\_15.0

Table S3b. continued

| <b>ID</b>       | <b>Accession</b> | <b>Description</b>                                                     | <b>Label in main Fig. 2</b> |
|-----------------|------------------|------------------------------------------------------------------------|-----------------------------|
| Sig70_famx2     | TIGR02952        | RNA polymerase sigma-70 factor, TIGR02952 family                       | other                       |
| Sig70_famx3     | TIGR02954        | RNA polymerase sigma-70 factor, TIGR02954 family                       | other                       |
| SigX4           | TIGR02957        | RNA polymerase sigma-70 factor, TIGR02957 family                       | other                       |
| SigZ            | TIGR02959        | RNA polymerase sigma factor, SigZ family                               | other                       |
| SigX5           | TIGR02960        | RNA polymerase sigma-70 factor, TIGR02960 family                       | other                       |
| SigBFG          | TIGR02980        | RNA polymerase sigma-70 factor, sigma-B/F/G subfamily                  | other                       |
| SigE-fam_strep  | TIGR02983        | RNA polymerase sigma-70 factor, sigma-E family                         | other                       |
| Sig-70_plancto1 | TIGR02984        | RNA polymerase sigma-70 factor, Planctomycetaceae-specific subfamily 1 | other                       |
| Sig70_bacteroi1 | TIGR02985        | RNA polymerase sigma-70 factor, Bacteroides expansion family 1         | other                       |
| Sig-70_gvs1     | TIGR02989        | RNA polymerase sigma-70 factor, Rhodopirellula/Verrucomicrobium family | other                       |
| Sig70-cyanoRpoD | TIGR02997        | RNA polymerase sigma factor, cyanobacterial RpoD-like family           | other                       |
| Sig-70_X6       | TIGR02999        | RNA polymerase sigma factor, TIGR02999 family                          | other                       |
| Sig-70_gmx1     | TIGR03001        | RNA polymerase sigma-70 factor, Myxococcales family 1                  | other                       |
